# Supplementary material
Source: PubMed Central journal article supplement (PMC6956536)

## Supplemental Table S1. Structure Determination Statistics

**Supplemental Table S2. Pairwise comparison of meiotic clade AAA unfoldases.** Percent sequence identities (<https://web.expasy.org/sim>) are shown for the sequence alignments of Figure 2E. Root mean square deviations between pairs of C $\alpha$  atoms (below) following overlaps of the five ATPase cassettes of subunits A-E treated as one rigid body. The number of residue pairs in the overlaps are indicated in parenthesis.

**Supplemental Figure S1. Cryo-EM and 3D reconstruction.** *A*, Representative electron cryomicrograph showing a homogeneous and monodisperse distribution of particles. *B*, The 19 2D classes used for *ab initio* model generation and 3D classification. Box size 256px (~242 Å) using a 160 Å circular mask. *C*, FSC of independent reconstructions using separate (odd:even particles) halves of the data. *D*, FSC between the refined model and the density map. *E*, Plot of angular distribution of particles used in final refinement. *F*, Color bar indicates local map resolution. *G*, Representative density and refined model for the  $\beta$ -sheet of subunit B (left) and the  $\alpha$ -helix ( $\alpha 5$ ) following the pore loop 2 residues of subunit D (right).

**Supplemental Figure S2. Flow chart of 3D reconstruction.** 2D classification filtered the 1,021,617 picked particles to 438,336 particles for 3D classification. Just under 30% (129,402) of those particles sorted into a class with good features, which was used to generate a 3D reconstruction at 4.3 Å resolution. Per particle CTF refinement and motion correction, and a final round of 3D classification, yielded a final reconstruction from 119,984 particles at 4.2 Å resolution after B-factor sharpening (-147 Å<sup>2</sup>).

**Supplemental Figure S3. Subunit structure.** The structure of a representative subunit (B) is shown with the secondary structural elements and sequence motifs labeled, as in Figure 2E.

**Supplemental Figure S4. Katanin binds peptide in an identical fashion to spastin.** Katanin spiral structure density (EMD-8794). Peptide and pore loop 1 residues were not modeled in the katanin structure determination (24). They are shown here for human spastin (colors) and *D. melanogaster* spastin (gray) following overlap on the large ATPase domains of subunits A-E. Human spastin subunit F, which is displaced from the spiral configuration, is not shown.

**Supplemental Video S1. Refined model with cryo-EM map.** Density is shown at 6.8 x sigma for the overall structure and the views of each individual subunit. For subunit F (magenta) the contour level is lowered to 4.4 x sigma.

Supplemental Table S1. Structure Determination Statistics

| <b>Reconstruction</b>                                    |                  |
|----------------------------------------------------------|------------------|
| <b>Particle Images</b>                                   | <b>119984</b>    |
| <b>Resolution (unmasked, Å)</b>                          | <b>4.3</b>       |
| <b>Resolution (masked, Å)</b>                            | <b>4.2</b>       |
| <b>Map Sharpening B-factor (Å<sup>2</sup>)</b>           | <b>-147</b>      |
| <b>EM Databank Accession Number</b>                      | <b>EMD-20327</b> |
| <b>Refinement and Validation of Spastin Subunits A-E</b> |                  |
| <b>Resolution used for refinement (Å)</b>                | <b>4.2</b>       |
| <b>Number of Atoms</b>                                   | <b>11106</b>     |
| <b>RMSD bond length (Å)</b>                              | <b>0.003</b>     |
| <b>RMSD bond angles (°)</b>                              | <b>0.427</b>     |
| <b>Phi/psi favored (%)</b>                               | <b>99.21</b>     |
| <b>Phi/psi allowed (%)</b>                               | <b>0.79</b>      |
| <b>Phi/psi outlier (%)</b>                               | <b>0.00</b>      |
| <b>Rotamer outliers (%)</b>                              | <b>0.00</b>      |
| <b>Molprobity score / percentile (%)</b>                 | <b>1.21/100</b>  |
| <b>Clashscore / percentile (%)</b>                       | <b>4.34/100</b>  |
| <b>EMRinger score</b>                                    | <b>0.82</b>      |

Supplemental Table S2

|                     | <i>D.m.</i> Spastin | <i>C.e.</i> Katanin | <i>S.c.</i> Vps4    |
|---------------------|---------------------|---------------------|---------------------|
| <i>H.s.</i> Spastin | 76%<br>2.8 Å (1100) | 46%<br>3.1 Å (1120) | 50%<br>1.7 Å (1175) |
| <i>D.m.</i> Spastin |                     | 48%<br>2.9Å (1040)  | 48%<br>3.2Å (1100)  |
| <i>C.e.</i> Katanin |                     |                     | 50%<br>3.2Å (1120)  |

Supplemental Figure S1

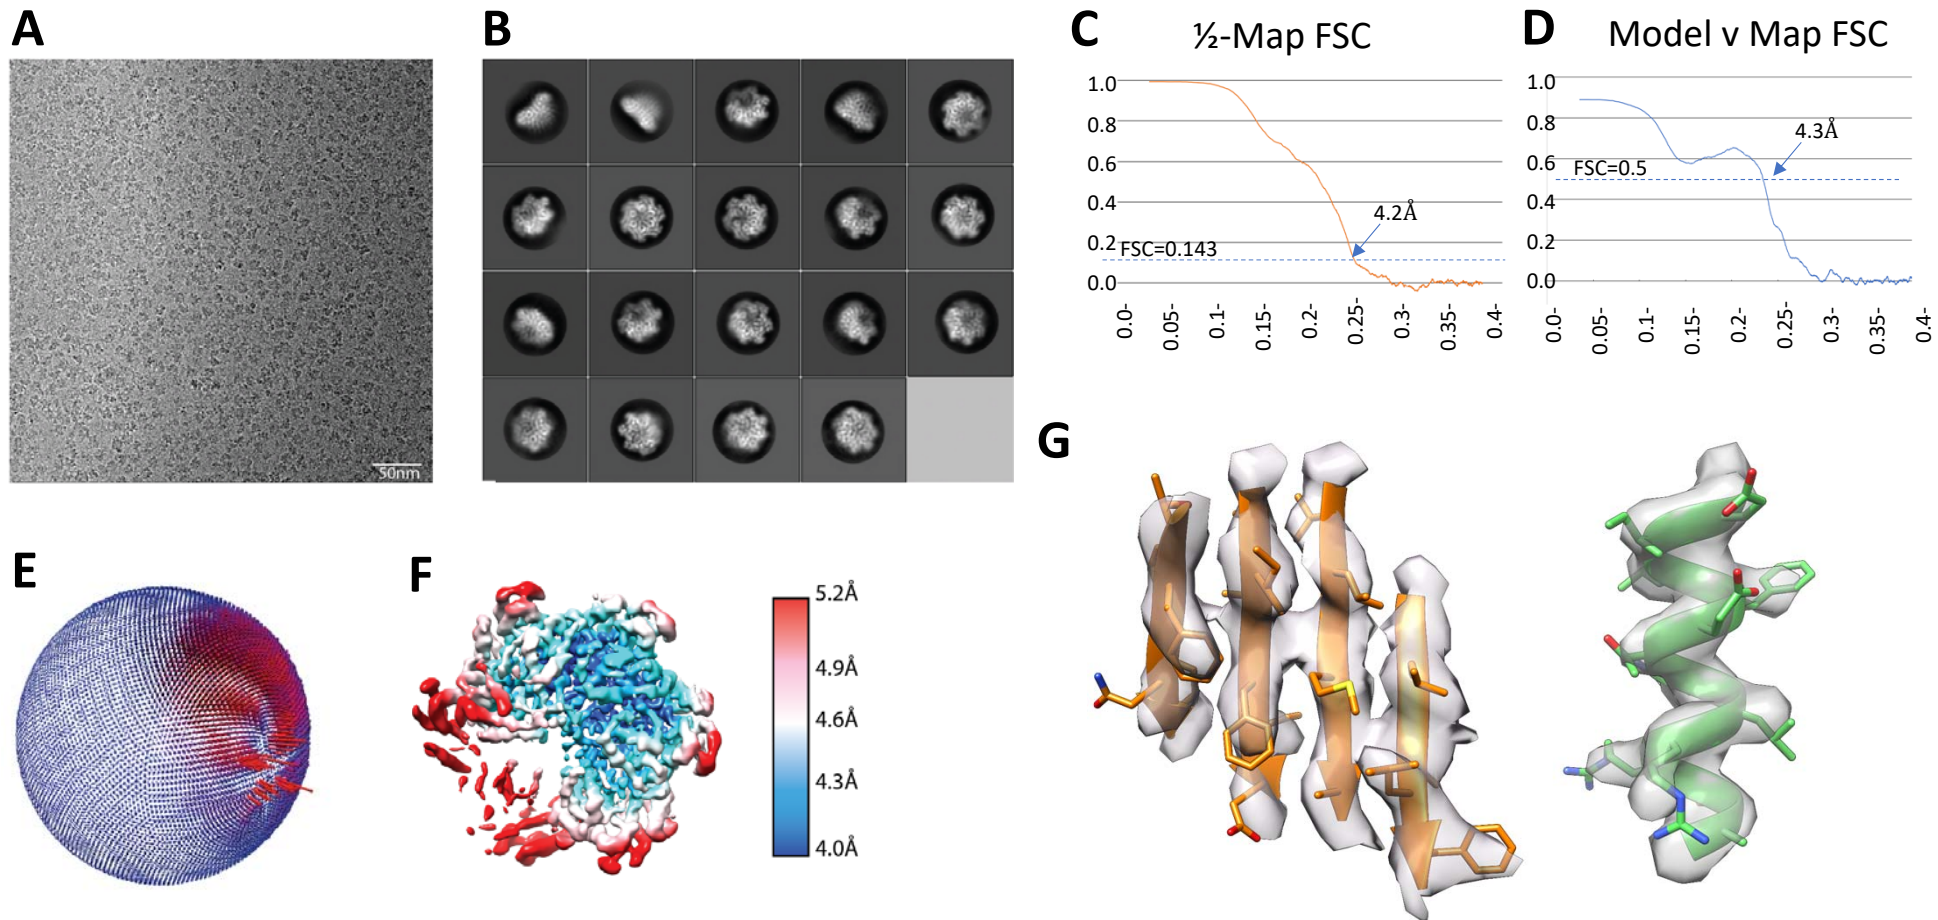

# Supplemental Figure S2

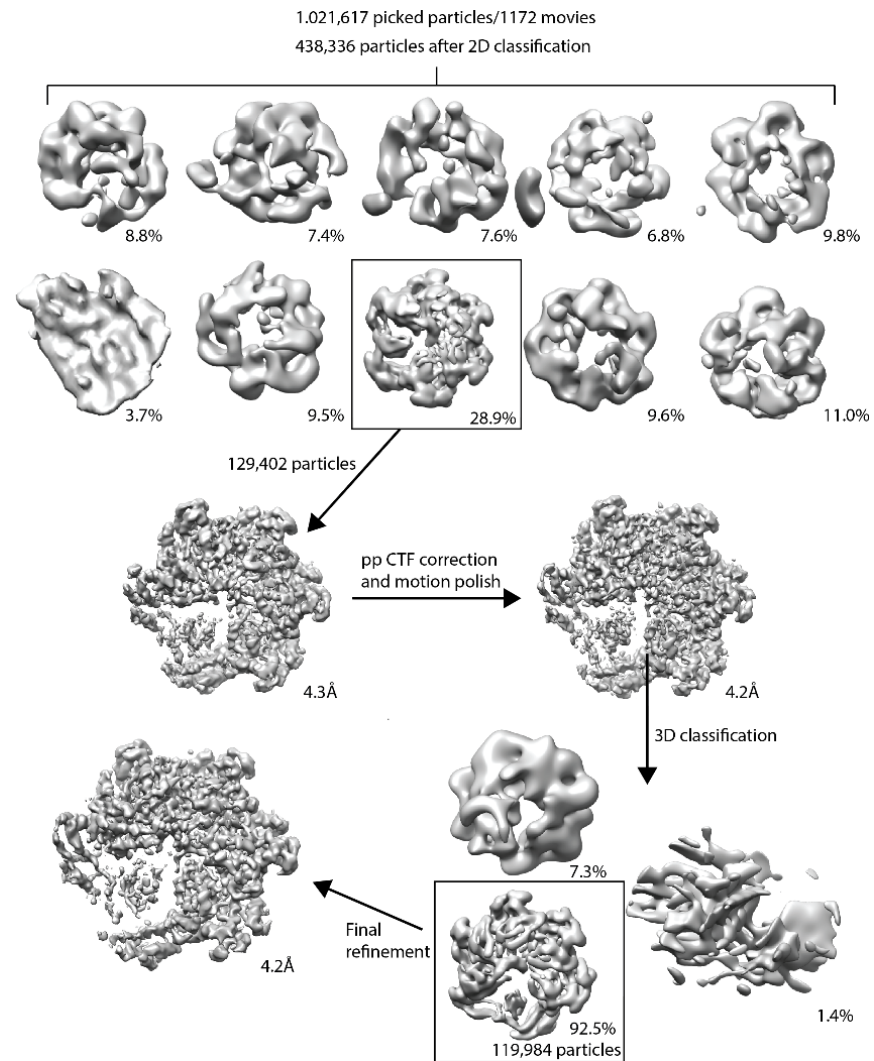

Supplemental Figure S3

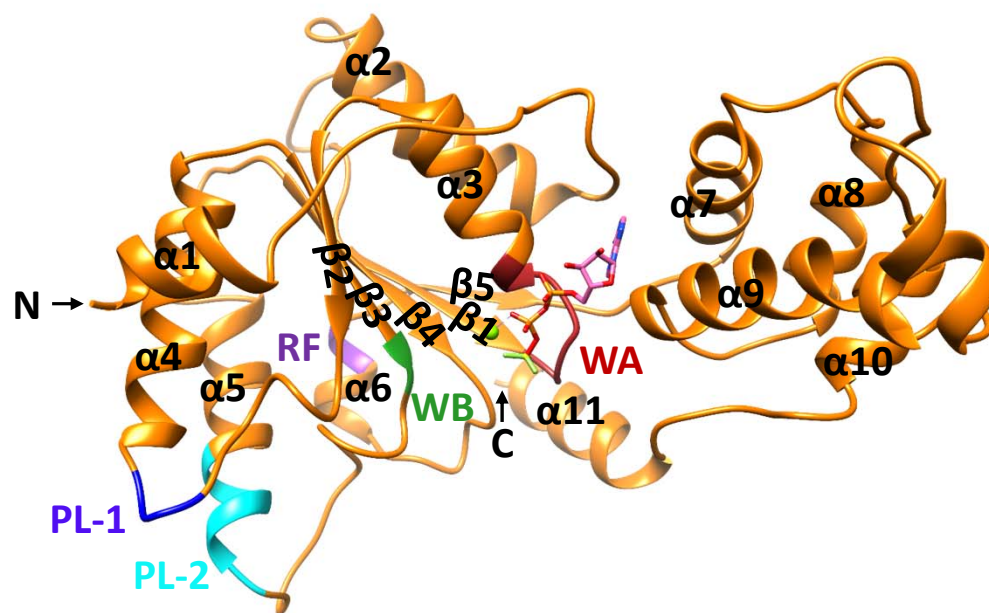

Supplemental Figure S4

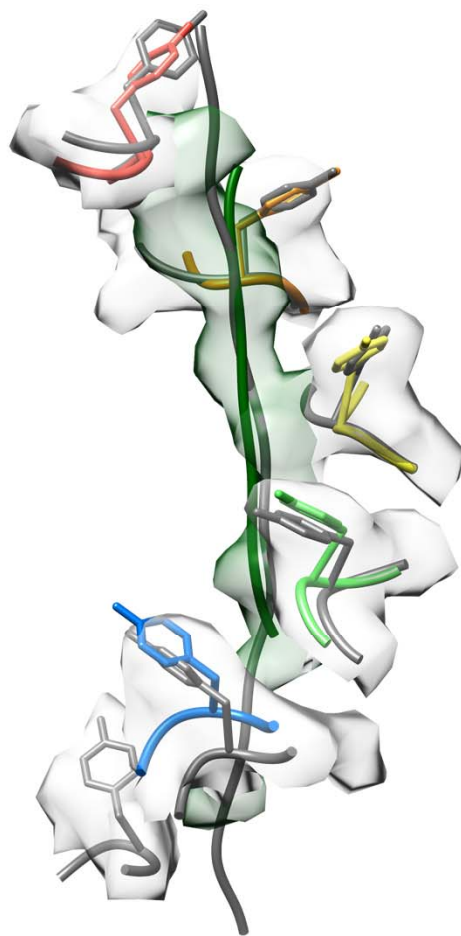

Supplement: supp_AC119.009890_153663_2_supp_432586_q1bkxf.pdf [file supp_AC119.009890_153663_2_supp_432586_q1bkxf.pdf]
